# Supplementary material
Source: PubMed Central journal article supplement (PMC7206537)
Supplement: jamaophthalmol-138-740-s001.pdf [file jamaophthalmol-138-740-s001.pdf]

## Supplementary Online Content

Waldstein SM, Vogl W-D, Bogunovic H, Sadeghipour A, Riedl S, Schmidt-Erfurth U. Characterization of drusen and hyperreflective foci as biomarkers for disease progression in age-related macular degeneration using artificial intelligence in optical coherence tomography. *JAMA Ophthalmol*. Published online May 7, 2020.  
doi:10.1001/jamaophthalmol.2020.1376

**eFigure.** Representative Examples of the Quantified Imaging Biomarkers

**eTable.** Logistic Regression Model

This supplementary material has been provided by the authors to give readers additional information about their work.

### eFigure. Representative Examples of the Quantified Imaging Biomarkers

Fully automated segmentation was used to quantify drusen and hyperreflective foci (HRF) in optical coherence tomography images. **Top row** shows an example of HRF overlying drusen, **middle row** shows an example of HRF not overlying drusen, and **bottom row** shows an eye with large drusen that is developing a macular neovascularization at that location one month later. The **left column** shows the SD-OCT images, and **right column** the corresponding segmentations overlaid. (Green) outer boundary of retinal pigment epithelium segmentation, (blue) Bruch's membrane segmentation, (yellow) drusen, (red) HRF segmentation.

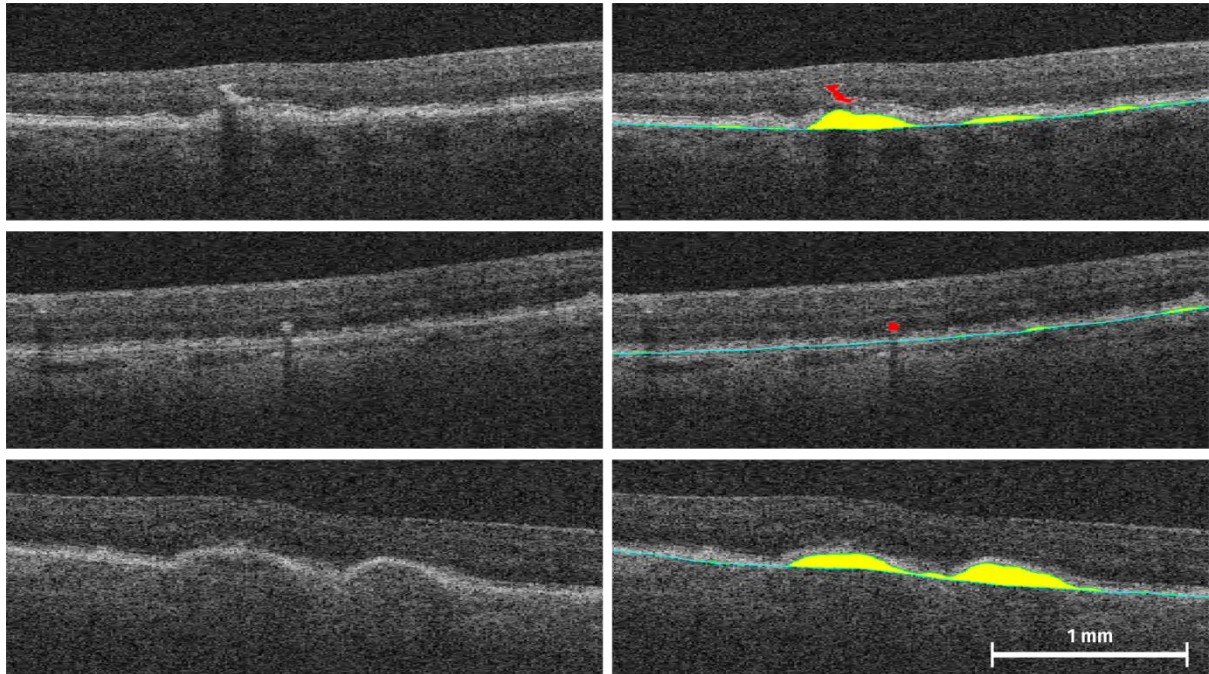

**eTable. Logistic Regression Model**

The table provides the area under the receiver operating characteristics curves (ROC AuC) for the logistic regression model targeting conversion to macular neovascularization (MNV) and macular atrophy (MA) using a set of different biomarkers. SD, standard deviation.

| Component                                    | Eccentricity | ROC AuC mean (SD) |              |
|----------------------------------------------|--------------|-------------------|--------------|
|                                              |              | MNV vs None       | MA vs None   |
| Baseline                                     |              | 0.55 (0.047)      | 0.36 (0.072) |
| Drusen volume                                | 0- 0.5mm     | 0.65 (0.063)      | 0.53 (0.101) |
|                                              | 0.5-1.5mm    | 0.66 (0.066)      | 0.59 (0.094) |
|                                              | 1.5-3mm      | 0.60 (0.066)      | 0.46 (0.095) |
| Hyperreflective foci volume                  | 0- 0.5mm     | 0.59 (0.066)      | 0.54 (0.102) |
|                                              | 0.5-1.5mm    | 0.62 (0.067)      | 0.73 (0.109) |
|                                              | 1.5-3mm      | 0.57 (0.061)      | 0.37 (0.078) |
| Hyperreflective foci not above drusen volume | 0- 0.5mm     | 0.56 (0.063)      | 0.40 (0.088) |
|                                              | 0.5-1.5mm    | 0.56 (0.06)       | 0.64 (0.121) |
|                                              | 1.5-3mm      | 0.54 (0.067)      | 0.37 (0.067) |
